1 *Effect of time-series length and resolution on abundance- and trait-based early warning signals of*  
2 *population declines*

3

4 Arkilanian A.A.<sup>1</sup>, Clements C.F.<sup>2,3</sup>, Ozgul A.<sup>2</sup>, and Baruah G.<sup>2</sup>

5

6

7 *1 Department of Biology, McGill University, Montreal, Quebec, H3A 1B1, Canada.*

8 *2 Department of Evolutionary Biology and Environmental studies, University of Zurich,*

9 *Winterthurerstrasse 30, 4055 Zurich*

10 *3 School of Biosciences, University of Melbourne, Parkville VIC 3052, Melbourne, Australia*

11

12

13

14

15 Corresponding author: Gaurav Baruah

16 Email : [gaurav.baruah@ieu.uzh.ch](mailto:gaurav.baruah@ieu.uzh.ch)

17

18

19 Running head: Effect of time-series on EWS

20

21

22

23

24

25 **Abstract**

26 Natural populations are increasingly threatened with collapse at the hands of anthropogenic effects.  
27 Predicting population collapse with the help of generic early warning signals (EWS) may provide a  
28 prospective tool for identifying species or populations at highest risk. However, pattern-to-process  
29 methods such as EWS have a multitude of challenges to overcome to be useful, including the low  
30 signal to noise ratio of ecological systems and the need for high quality time-series data. The inclusion  
31 of trait dynamics with EWS has been proposed as a more robust tool to predict population collapse.  
32 However, the length and resolution of available time series are highly variable from one system to  
33 another, especially when generation time is considered. As yet it remains unknown how this variability  
34 with regards to generation time will alter the efficacy of EWS. Here we take both a simulation- and  
35 experimental-based approach to assess the impacts of relative time-series length and resolution on the  
36 forecasting ability of EWS. We show that EWS' performance decreases with decreasing length and  
37 resolution. Our simulations suggest a relative time-series length between ten and five generations and a  
38 resolution of half a generation are the minimum requirements for accurate forecasting by abundance-  
39 based EWS. However, when trait information is included alongside abundance-based EWS, we find  
40 positive signals at lengths and resolutions half of what was required without them. We suggest that, in  
41 systems where specific traits are known to affect demography, trait data should be monitored and  
42 included alongside abundance data to improve forecasting reliability.

43

44 **Keywords:** early warning signals, population collapse, sampling, time-series length, trait-based EWS

45

46

47

48

## 49 **Introduction**

50 Anthropogenic pressures have long been known to reduce the resilience of ecological systems, leaving  
51 them vulnerable to transitioning into undesirable states where the systems' ability to provide valuable  
52 ecosystem services is diminished. Such undesirable transitions have occurred in multiple systems such  
53 as in the global whale stock collapse of the 20<sup>th</sup> century due to overfishing (Hilborn et al. 2003,  
54 Clements et al. 2017); lake eutrophication through heavy nutrient input (Smith and Schindler 2009); or  
55 coral bleaching as a result of increased ocean warming (Hughes et al. 2017). In many cases recovery  
56 from such a perturbed state can be difficult as complex systems such as those seen in ecology often  
57 show hysteresis (Folke et al. 2004, Scheffer et al. 2009), thus driving a need to minimize impacts on  
58 biological systems, as well as a developing effective methods to monitor them (Costanza et al. 1997).

59  
60 Early warning signals (EWS) have been shown to predict population collapses (Wissel 1984, Drake and  
61 Griffen 2010, Dai et al. 2012, Clements and Ozgul 2018) and shifts in ecosystem states (Scheffer et al.  
62 2009, Carpenter et al. 2011). These indicators provide the possibility to intervene and reverse these  
63 undesirable events (Biggs et al. 2009, Pace et al. 2017). Classical EWS are statistical signatures which  
64 arise as a result of a phenomenon known as critical slowing down (CSD) that occurs prior to an  
65 ecosystem transition (Dakos et al. 2008, Scheffer et al. 2009, Clements and Ozgul 2018). CSD occurs  
66 as a system loses stability in the face of increasing external stress and takes longer to return to its  
67 original equilibrium state (Wissel 1984). Directly measuring CSD requires monitoring the return rate of  
68 the system which is challenging to do in natural systems. Alternatively, whether a system is  
69 experiencing CSD can be inferred through other statistical metrics measured over state-based data, for  
70 example abundance time series. Some proposed statistical signatures related to the return rate of a  
71 dynamical system are variance and autocorrelation, although various other metrics have also been

72 developed (Dakos et al. 2012a). Increases in variance and autocorrelation in abundance time series,  
73 known as classical abundance-based EWS (Drake and Griffen 2010, Dai et al. 2012), are shown both  
74 theoretically and experimentally to occur in systems approaching transition (Drake and Griffen 2010,  
75 Carpenter et al. 2011, Dakos et al. 2012b, Clements and Ozgul 2016b).

76  
77 Increases in variance and autocorrelation, along with other classical abundance-based EWS, provide an  
78 ideal generic method that responds to the dynamics of the system independent of any system-specific  
79 data such as intrinsic demographic processes and extrinsic environmental factors. However, the  
80 performance of these classical EWS has been questioned in numerous simulations (Hastings and  
81 Wysham 2010, Boerlijst et al. 2013b, Clements et al. 2015, Burthe et al. 2016, Clements and Ozgul  
82 2016a, Dutta et al. 2018) as well as in experimental and field data (Wilkinson et al. 2017, Pace et al.  
83 2017). Recent studies on data quality have shown that these signals might require high-resolution time-  
84 series data to produce reliable forecasting (Clements et al. 2015). Given that EWS are statistics derived  
85 from abundance time series, the quality of data available is critical to obtain a strong forecast by EWS  
86 and temporal limitations might have many consequences.

87  
88 In monitoring programs from natural ecological systems high resolution data can be hard to achieve. In  
89 addition, data can be spatially and temporally limited due to constraints on resources. Thus, data from  
90 ecological systems can often present with short time-series lengths, low sampling resolutions, or both  
91 (Clements et al. 2015). Further, abundance time-series data collected in field or experimental  
92 populations can vary greatly in temporal quality. For instance, in a laboratory experiment, populations  
93 of *Didinium nasutum* were sampled roughly once every two generations for 45 days before a collapse  
94 of the population occurred (Clements and Ozgul 2016a) while in a field experiment data on a lake  
95 system was collected once a day during the summer season for three years (Carpenter et al. 2011).

96 Similarly, in wild populations demographic data is generally collected monthly (van Benthem et al.  
97 2017) or annually (Walle et al. 2018). Due to these differences in sampling effort the temporal quality  
98 of the time series relative to the process rate of the system (for example the generation time of the  
99 species sampled) will vary (Clements and Ozgul 2018). Previous work suggested that the length and  
100 resolution of data being analyzed in relation to the process rate, that is: the relative length and  
101 resolution, could alter the rate at which a tipping point occurs (Spanbauer et al. 2016). Following this, it  
102 has been shown that the speed at which a tipping point occurs can affect the detectability of abundance-  
103 based EWS (Clements and Ozgul 2016b). It is thus unknown how the temporal quality of the time  
104 series relative to the generation time of the organisms being monitored will affect the detectability of  
105 abundance-based EWS. Given that wild populations are monitored using varied sampling efforts, it is  
106 important to further our understanding of the relative length and resolution of time series needed to  
107 derive reliable EWS. In turn, this would help lay the foundation for generalizable guidelines for the  
108 monitoring of populations with the aim of reliably predicting population declines, or whether time  
109 series that are currently available will be suitable for detecting abundance-based EWS.

110

111 Composite EWS have been proposed as a more reliable method whereby multiple leading indicators  
112 are combined to increase overall forecasting ability (Drake and Griffen 2010). Recent work has used  
113 this composite approach to drive the inclusion of fitness related phenotypic trait data, specifically body  
114 size, alongside abundance-based methods to create trait-based EWS (Clements and Ozgul 2016a,  
115 Clements et al. 2017). The motivation behind the use of fitness-related trait data combined with leading  
116 indicators comes from a body of work providing evidence that individual traits affected by changes in  
117 the external environment are linked with concurrent demographic changes (Ozgul et al. 2009, Pigeon et  
118 al. 2017, Baruah et al. 2019b). In particular, individual plasticity in body size has been shown to buffer

119 environmental change to higher trophic levels for example in the face of reduced food availability,  
120 climate change, and increased pollution (Brown et al. 2004, Cheung et al. 2013), For example, previous  
121 study has shown that shifts in body size can accompany a transition in diatom communities (Spanbauer  
122 et al. 2016). In addition, trait-based signals derived from body size data have been shown to be more  
123 robust than traditional abundance-based leading indicators (Clements and Ozgul 2016a, Clements et al.  
124 2017, Baruah et al. 2019b). There remains a need to fully assess whether the inclusion of body size data  
125 leads to any considerable improvement in forecasting population collapses in the face of common data  
126 quality issues, such as shortened time-series lengths.

127

128 In this paper, we use model-simulations and data from microcosm populations of *Didinium nasutum*  
129 (Clements and Ozgul 2016a) to test and compare the effects of sampling length and resolution on the  
130 detectability of population collapse by both classical abundance-based EWS as well as trait-based  
131 EWS. We first investigated the strength and reliability of abundance-based EWS across a range of  
132 sampling lengths and resolutions. Subsequently, we tested whether the inclusion of trait dynamics  
133 (body size) can increase forecasting ability even when data is sparse.

134

## 135 **Methods**

### 136 *2.1 Simulations: transcritical and fold bifurcation model*

137 We first modeled the logistic growth of a population that moves from an underexploited state to critically  
138 exploited state through a non-catastrophic transcritical bifurcation. The population is forced through the  
139 transcritical bifurcation via a linear harvesting regime. The dynamics of this population are given by:

$$140 \quad dN/dt = rN(1 - N/K) + \sigma NdW - c_t N \quad (1)$$

141 where,  $r$  is the growth rate of the population (0.5 individuals/day),  $K$  is the carrying capacity (100  
142 individuals),  $c_t$  is the harvesting rate, and  $\sigma NdW$  is the Gaussian distributed white noise process with

143 mean 0 and standard deviation  $\sigma$  (1.5). Time step  $dt$  used was 0.3 for each of the stochastic simulations  
144 and was implemented using the Euler approximation. The simulation was run for 100 total time steps.  
145 Next, to simulate the dynamics of population collapse via a fold catastrophe, we used a second model  
146 where harvesting of individuals of the population followed a non-linear function (May 1977, Scheffer  
147 2009). The parameters in this model are identical to those of the transcritical catastrophe model except  
148 for the addition of  $h$ , the half-saturation constant:

$$149 \quad dN/dt = rN(1 - N/K) + \sigma NdW - c_t N^2 / (h^2 + N^2) (2)$$

150

## 151 2.2. Population collapse and abundance-based EWS:

152 We simulated population collapse for the two models by increasing the value of the harvest parameter  
153  $c_t$  linearly with time. We used three different levels of forcing (Clements and Ozgul 2016b) : 1) slow  
154 forcing: where the rate of forcing increased linearly from 0.03 and 0.0015 in fold and transcritical  
155 models respectively; 2) moderate forcing: where the forcing parameter  $c_t$  increased linearly at the rate  
156 of 0.045 and 0.0025 in fold and transcritical models respectively; fast forcing: where the forcing  
157 parameter  $c_t$  increased linearly at the rate of 0.07 and 0.004 in fold and transcritical bifurcation models  
158 respectively. For each simulated population's time-series data, we estimated the bifurcation time point  
159 by fitting GAMS (Generalized Additive Modelling) to  $1/N (dN/dt)$  over time  $t$ . The time point at  
160 which  $1/N (dN/dt) < 0$  is then our estimated bifurcation time point. For abundance-based EWS'  
161 analyses we discarded abundance time-series data after the estimated bifurcation point. We then applied  
162 generic EWS of population collapse by using the *earlywarnings* package (Dakos et al. 2012a) in R  
163 version 3.5.2 (R Core Team 2018). Specifically, we used two early warning indicators: autocorrelation  
164 at first-lag ( $ar(1)$ ) and standard deviation ( $sd$ ). Other indicators such as return rate, first-order  
165 autoregressive coefficient, coefficient of variation can theoretically be derived from these two main  
166 indicators. We used Gaussian detrending to remove any trends in the abundance time-series data. To

167 quantify the strength of population collapse, we calculated Kendall's Tau correlation coefficients of the  
168 statistical indicators over time. Strong positive Kendall's Tau correlation of the statistical indicators ( $sd$ ,  
169  $ar(1)$ ) with time would indicate an approaching population collapse (Dakos et al. 2012b). We further  
170 quantified the rate of false negatives as the number of times Kendall's Tau value calculated to be less  
171 than or equal to zero within the set of replicate time series. While previous work has suggested that a  
172 strong trend is indicated by a Kendall's tau correlation approaching one (Dakos et al. 2012b), we use  
173 this false negative metric as an alternative visualization to presenting raw Kendall's tau values.

174

### 175 *2.3 Effect of sampling in relation to simulated population dynamics on EWS*

176 To study the effect of varying resolutions on the detectability of collapse, we subset the data into four  
177 datasets that varied in their resolution: as the generation time for the populations in the simulation models  
178 is  $t=1$ , sampling of the abundance time series was done every quarter of  $t$ , every half of  $t$ , every  $t$ , and  
179 every two  $t$ . Interpolation between points was not performed. With these four datasets, we explored the  
180 effect of different sampling resolutions on the efficacy of EWS forecasting. Specifically, we assessed the  
181 resolution required to detect positive EWS. We assessed the effect of these sampling regimes on EWS  
182 for the three different levels of environmental forcing as mentioned in section 2.2. Next, we calculated  
183 Kendall's tau correlation coefficients as a measure of the strength of EWS and rates of false negatives as  
184 a measure of the reliability of EWS for these sampling regimes and for each level of environmental  
185 forcing.

186

### 187 *2.4 Effect of varying length of simulation abundance time series on EWS*

188 To quantify the effect of varying lengths of abundance time series on EWS we used the quarter  
189 generation sampling resolution dataset acquired following section 2.3. We used this resolution as it  
190 allowed us to explore the largest range of time-series lengths. Next, we quantified the strength and



191 reliability of EWS on the entire length of the abundance time series and then re-quantified it using the  
192 same time series but with the earliest data point removed (or the furthest data point from the bifurcation  
193 point). We repeated this process by sequentially removing the earliest data point and re-performing  
194 EWS analysis until the time series was 6 data points, where it becomes too short for any meaningful  
195 analysis. *sd* and *ar(1)* that were estimated on abundance data using the ‘*earlywarnings*’ package  
196 typically uses a sliding window approach where the window size is generally 50% of the time series  
197 length. At 6 data points, rolling window size of 50% of the time series would be just two data points,  
198 where estimating autocorrelation and standard deviation would lead to spurious values. We performed  
199 this length reduction analysis on time series from the three forcing scenarios mentioned in section 2.2.  
200 Finally, we calculated Kendall’s tau correlation coefficients as a measure of the strength of EWS and  
201 rates of false negatives as a measure of the reliability of EWS for these sampling regimes and for each  
202 level of environmental forcing.

203 The parameters used in our simulations were chosen such that in all three forcing scenarios populations  
204 persisted long enough to return sufficiently long time series. This allowed us to later reduce their length  
205 and re-analyze them giving us a range of time series lengths for each resolution and forcing scenario.

206

### 207 *2.5. Experimental data*

208 In addition to the model simulations, we also analyzed an experimental microcosm dataset. In this  
209 experiment, microcosm populations were forced to collapse by varying the rate of decline in food  
210 availability over time in four different scenarios: 1) fast decline in food availability, 2) moderate decline  
211 in food availability, 3) slow decline in food availability, 4) constant food availability as the control  
212 treatment. The microcosm populations consisted of protozoan ciliate *Didinium nasutum* feeding on  
213 *Paramecium caudatum*. This particular experiment used a total of 60 replicate populations, where 15  
214 replicates were used per treatment. In our study, we used the microcosm data only from the three different

215 deteriorating environments (fast, moderate and slow decline in food availability). For details of the  
216 experimental design refer to Clements and Ozgul 2016a.

217

### 218 *2.5.1 Effect of varying length of experimental time series on EWS*

219 For each of the three experimental treatments (fast, moderate, and slow), we estimated the effect of  
220 different lengths of time series on the efficacy of EWS as was done with simulation data in section 2.4  
221 to directly compare our simulation results with the experimental data.

222

### 223 *2.5.2 Effect of sampling in relation to microcosm population dynamics on EWS*

224 We subset the experimental data into two sampling regimes. Since *Didinium nasutum* has a generation  
225 time of roughly 2 days (Beers 1926), sampling of the abundance time-series data was done: 1) every  
226 half a generation (everyday), 2) every generation (every 2 days). Subsampling of this kind was done for  
227 each of the three experimental treatments of the microcosm population collapse. Next, as was done  
228 with simulation data, we quantified Kendall's tau correlation coefficients as a measure of the strength  
229 of EWS and rates of false negatives as a measure of the reliability of EWS for these sampling regimes  
230 and for each level of environmental forcing.

231

### 232 *2.6 Inclusion of body size data: trait-based EWS*

233 We wanted to assess whether including trait dynamic information (body size) alongside abundance-  
234 based EWS would improve the predictability of population collapse for the scenarios of time-series  
235 length and for the sampling resolutions in the experimental data for the three forcing experimental  
236 treatments. To evaluate the utility of trait-based EWS for the different sampling resolutions and lengths  
237 of abundance time series, data from mean body size was incorporated with the leading indicators in an  
238 additive manner (Clements and Ozgul 2016a). We z-standardized abundance-based EWS (standard

239 deviation ( $sd$ ), autocorrelation at-lag-1 ( $ar(1)$ ), and body size time-series data. The length of body-size  
240 time series that was used was the same as the corresponding replicate abundance time series. Before a  
241 population collapse,  $sd$  and  $ar(1)$  are anticipated to increase linearly over time, while body-size is  
242 expected to decline as food availability in the experimental treatment decreases. As a consequence, z-  
243 standardized body-size time series were multiplied by -1 so that they could be included alongside  
244 standardized abundance-based EWS. Next, standardized abundance-based EWS were then added to  
245 standardized mean body-size time series to create trait-based EWS. Next, we evaluated two trait-based  
246 EWS metrics namely  $ar(1)+mean\ body\ size$ ,  $sd+mean\ body\ size$ . Finally, we compared these two trait-  
247 based EWS in terms of strength and reliability of forecasting a population collapse with the abundance-  
248 based statistical EWS for both the scenarios of varying time-series length and varying sampling  
249 resolution.

250

## 251 **Results**

### 252 *3.1 Effect of sampling resolution on abundance-based EWS (simulated data)*

253 Reducing the resolution of the time series used for analysis with abundance-based EWS in simulated  
254 populations did not led to significant reductions in the strength of abundance-based indicators of  
255 population collapse for slow and fast forcing levels. However, for moderate forcing levels, particularly  
256 for  $sd$ , decreases in the resolution of the time series generally led to decreases in the median strength of  
257 the signal of population collapse (Fig. 1 – yellow, Appendix S1:Fig. S4-6). Further, at highest  
258 resolutions in the moderate forcing levels, we see the highest Kendall's tau values indicating that time  
259 series at this resolution return the most confident forecasts capable of passing more strict thresholds  
260 than our own at a tau value of zero. While the median strength of signals ( $sd$  and  $ar(1)$ ) did not  
261 generally drop with decreasing resolution (Fig.1), the proportion of false negatives increased with  
262 decreasing resolution, particularly for slow and moderate environmental forcing (Appendix S1:Table

263 S1). For fast environmental forcing, however, false negatives increased as resolution decreased. This  
264 particular result indicated that abundance-based EWS were unable to forecast collapse of populations  
265 as resolution decreased for fast environmental forcing (Appendix S1:Table S1). For  $sd$ , in slow and  
266 moderate levels of environmental forcing, rate of false negative decreased slightly as resolution  
267 increased. In general, forecasts became reliable only when there was moderate level of environmental  
268 forcing as we increase time series resolution.

### 269 *3.2 Effect of length of time series on abundance-based EWS (simulated data):*

270 In simulations, decreasing the length of the sampling time series before either a fold or transcritical  
271 bifurcation negatively affected the performance of abundance-based EWS  $ar(I)$  and  $sd$  across all three  
272 intensities (Fig. 2, Appendix S1:Table S2). Particularly for moderate forcing,  $ar(I)$  and  $sd$  had a strong  
273 decline in Kendall's tau value (slope = -0.09 and  $R_2 = 0.8$  for  $ar(I)$  ; slope = -0.07  $R_2=0.71$  for  $sd$  ) as  
274 length of time series decreased regardless of the type of bifurcation. Moreover, as forcing increased, the  
275 decline of signal reliability (Fig. 2B) and signal strength (Fig. 2A), as indicated by the rate of false  
276 negatives and the Kendall's tau value respectively, saw a steeper decline. With fast forcing, when time  
277 series dropped below approximately ten generations long both EWS performed poorly with Kendall's  
278 tau values near zero (Fig. 2A) and approximately 50% false negatives (Fig. 2B). With moderate  
279 forcing, this minimum length drops closer to 5 generation long timeseries. Finally, with slow forcing  
280 the minimum timeseries length becomes less clear, particularly for fold bifurcation, as slopes of  
281 Kendall's tau value against length of time series were small for both  $ar(I)$  (slope = -0.01,  $R_2 = 0.39$ )  
282 and  $sd$  (slope = -0.0003,  $R_2 = -0.009$ ). For, transcritical bifurcation and for slow forcing (dotted lines,  
283 Fig. 2A slow), however, the minimum length drops to around 5 to 10 generation long time series for  
284 both  $sd$  (slope = -0.075,  $R_2 = 0.22$ ) and  $ar(I)$  (slope = -0.09,  $R_2 = 0.43$ ).

285

### 286 *3.3 Effect of sampling resolution on abundance and trait-based EWS (experimental data):*

287 Decreasing the resolution of the time series in microcosm populations led to decreases in the strength  
288 of abundance-based EWS (Fig. 3), corroborating the results of model simulations (Fig. 1). The decrease  
289 in strength of was most noticeable in *sd*, while *ar(1)* remained nearly constant as resolution was  
290 decreased (Fig. 3).

291

292 Including information from mean body size data alongside abundance-based EWS to create trait-based  
293 EWS led to significant increases in strength and reliability of predicting population collapse regardless  
294 of forcing strength, or time-series resolutions (Fig. 3, dark colors).

295 The rate of false negatives was substantially high for abundance-based EWS across the two different  
296 time series resolution for the experimental data (appendix S1:Fig. S2). In comparison to *ar(1)*, the false  
297 negative rate of *sd* was higher in slow and fast decline in food availability across the two time series  
298 resolutions. When the resolution of time series decreased the rate of false negatives increased for  
299 abundance-based EWS, particularly for *ar(1)* (appendix S1:Fig. S2). In contrast, trait-based EWS were  
300 significantly more reliable in forecasting population collapse even when time series resolution was low.

301

### 302 *3.4 Effect of length of time series on abundance and trait-based EWS (experimental data):*

303 In agreement with the results from simulations, abundance-based EWS derived from microcosm data  
304 saw an increase in false negatives and a decrease in signal strength as the length of the sampling time  
305 series was decreased (Fig. 4A, 4B, dotted lines). This was most noticeable with fast forcing but also  
306 occurred in all forcing conditions with time series of six or less generations long. However, the drop in  
307 performance seen in microcosm data was lower than in the simulations, which is partially due to the  
308 fact that the former performs the analysis on a smaller range of time-series lengths.

309

310 Furthermore, trait-based EWS i.e., including body size information alongside abundance EWS,  
311 significantly improved the strength as well as reliability of population collapse across different length  
312 in time-series data for different levels of environmental forcing. With trait-based EWS, Kendall's tau  
313 value always remained positive regardless of very short time series and strength of environmental  
314 forcing (Fig 4A, solid lines). Only during slow environmental forcing scenario, and when length of  
315 time series was less than 5 generations, trait inclusive  $ar(1)$  was unable to predict population collapse.  
316

### 317 **Discussion**

318 Generic EWS would provide a unique tool for conservation prioritization and management of  
319 populations facing increased stress with changes to their abiotic environment if they are detectable  
320 prior to their collapse (Scheffer et al. 2009, Dakos et al. 2012b, Burthe et al. 2016). The attraction of  
321 generic EWS is their relative simplicity; they are easy to calculate and require only state data such as  
322 the abundance of a population (Drake and Griffen 2010, Boettiger et al. 2013, Dutta et al. 2018).  
323 Alternative approaches such as trait-based EWS have been developed with the goal of providing more  
324 reliable predictions of population collapse but require additional data to calculate (Clements and Ozgul  
325 2016a, Clements et al. 2017). For both complementary approaches how the relative length and  
326 resolution of a time series may affect their performance has thus far remained unknown. This question  
327 is critical for our understanding of the utility and applicability of these methods (Boerlijst et al. 2013a,  
328 Boettiger and Hastings 2013). Here, using simulations and experimental data, we show that time-series  
329 length and resolution relative to the process rate of the system in question significantly influence the  
330 performance of abundance-based EWS. Further, we found that including average body size with  
331 abundance-based EWS leads to stronger and more reliable signals even when temporal length and  
332 resolution of the time series are low.

333

334 4.1 Effect of resolution of sampling time series on abundance-based and trait-based EWS

335 Reducing the resolution of time series in simulated and experimental populations subjected to different  
336 forcing levels led to a decrease in the performance of abundance-based EWS (Fig. 1 and 3). Reliability  
337 of abundance-based EWS, particularly *sd*, in forecasting population collapse for the experimental  
338 microcosms was rather poor when resolution was decreased. In fact, for the fast decline in food  
339 availability treatment false negative rate rose to 90% as time series resolution was decreased. On  
340 average, *ar(1)* performed better in forecasting population collapse than *sd* when time series resolution  
341 was manipulated for the experimental microcosm data. There were important differences in the  
342 behavior of abundance-based EWS calculated between simulated and experimental populations. Low  
343 reliability of *sd* could probably be attributed to the fact that experimental systems are inherently more  
344 stochastic. While in simulated population we found *sd* to produce the most robust signal of population  
345 collapse (Fig. 1), in experimental populations *ar(1)* performed better across varying resolutions (Fig.  
346 3). Our simulated populations were likely subjected to smaller amounts of stochasticity in population  
347 size compared to our experimental populations. Given that *sd* is sensitive to rising stochasticity in a  
348 system (Boettiger and Hastings, 2013), one could expect *sd* to perform better when there is a high level  
349 of environmental stochasticity. Indeed, results from replicate simulations, where we varied stochasticity  
350 levels and measured the performance of abundance-based EWS suggested that *sd* performed relatively  
351 better when environmental stochasticity was higher. However, *ar(1)*, regardless of low or high  
352 environmental stochasticity, performed better than *sd*. In fact, when there was high environmental  
353 stochasticity, *ar(1)* outperformed *sd*, confirming our speculation on the performance of *ar(1)* when  
354 environmental stochasticity was high (appendix S1:Fig. S1).

355 In addition, abundance-based EWS showed a greater sensitivity to system stochasticity than trait-based  
356 EWS did; the latter did not present any obvious differences in performance between metrics used (Fig.  
357 3). This is possibly an effect of adding phenotypic data to abundance data which stabilizes the signal

358 through time and reduces stochasticity. This is an important finding if abundance-based EWS are to be  
359 used to monitor natural populations which likely have more stochasticity than laboratory populations.

360

361 As observed with abundance-based EWS, trait-based EWS also saw a decrease in their performance  
362 with decreasing sampling resolution (Fig. 3). However, these drops were in most cases very small and  
363 the performance of trait-based EWS was much better than abundance-based EWS alone. Trait-based  
364 EWS calculated with the lowest resolution in either simulated or experimental populations still derived  
365 a more reliable forecast than abundance-based EWS calculated with the highest possible resolution.

366

367 Our findings suggest that abundance-based EWS derived from autocorrelation at-first-lag would  
368 perform better in natural populations subjected to high levels of stochasticity when compared with  
369 standard deviation derived signals when the resolution of available abundance time series is low. On  
370 the other hand, the inclusion of trait data with either metric led both to an increase in EWS performance  
371 when faced with reduced sampling time-series resolutions and minimized any important differences  
372 between the two time-series metrics used. Thus, whenever possible, trait-based EWS will likely  
373 outperform abundance-based EWS in natural populations (but see (Baruah et al. 2019b)) and, when  
374 trait data is not available, abundance-based EWS derived from autocorrelation at-first-lag are more  
375 powerful and reliable indicators.

376

#### 377 *4.2 Effect of length of sampling time series on abundance-based and trait-based EWS*

378 Reducing the length of the sampling time series in simulated data negatively affected the performance  
379 of abundance-based EWS. In our simulation study, having longer timeseries led to stronger EWS,  
380 particularly for slow and moderate levels of environmental forcing. In general, time series from slow  
381 and moderate forcing scenarios with lengths less than 5 generations returned weaker forecasts of



382 population collapse with higher rates of false negatives (Fig. 2). The choice of fold or transcritical  
383 bifurcation models had little influence on predictability of population collapse, with the exception of  
384 the fast forcing scenario. When forcing was fast, transcritical models showed a shift in trend indicating  
385 the length of time series no longer had a strong effect on the predictability of collapse (Fig. 2 – dashed  
386 lines). In the context of a ciliate population such as the one used in the microcosms of this paper (*D.*  
387 *nasutum*) 10 generations corresponds to roughly 20 days. Twenty days' worth of sampling might seem  
388 feasible to generate reliable forecasting for a ciliate population. However, for this same reliability in a  
389 population experiencing rapid forcing, 22 to 35 years of sampling would be required in the case of  
390 *Thynnus thynnus* (Atlantic bluefin tuna): an endangered species of high economic concern with a  
391 generation time between 2.2 to 3.5 years (Collette et al. 2011). For organisms with longer generation  
392 times such as *T. thynnus*, the required investment of resources and time becomes an important  
393 consideration if there is a desire to monitor populations using abundance-based EWS. In addition, we  
394 found that abundance time series require a minimum of 10 generations worth of data when forcing is  
395 fast and a minimum of 5 when forcing is moderate (Fig. 2). This finding suggests that in situations  
396 where forcing is more intense and, thus, populations are most at risk the requirement for good quality  
397 data is extended. This requirement of long time series is a clear shortcoming of abundance-based EWS  
398 for organisms with long generation times and populations experiencing rapid forcing.

399

400 In our microcosm study, the effect of time-series length on the Kendall's tau metric was less clear than  
401 in the simulation. However, a general decreasing trend in forecasting strength was still observed in  
402 most forcing scenarios. In addition, abundance-based EWS rarely had the length of sampling required  
403 to make a confident forecast of collapse. It appears that regardless of improvements brought about by  
404 the increased length of the sampling time series, most abundance-based EWS did not provide a  
405 confident forecast even with the maximum length of sampling time series (between 10 and 12.5

406 generations). In our simulations we showed that abundance time series need a minimum of 10  
407 generations of data to provide an accurate forecast. These microcosm results show that the required  
408 minimum length of sampling exceeds 10 generations in controlled laboratory settings. Thus, we can  
409 expect that in natural populations subjected to higher levels of stochasticity the minimum length of  
410 sampling might exceed even that which is required in the microcosms. However, in natural populations  
411 there is the possibility to measure phenotypic data and derive trait-based EWS which we have  
412 additionally assessed. The addition of phenotypic data with abundance data improved forecasting in the  
413 microcosms. Trait-based EWS, that included body size information alongside abundance-based EWS,  
414 offered a significant improvement over abundance-based EWS, providing a positive forecast of  
415 collapse for all time-series lengths tested.

416 Our modelling scenario of timeseries length and resolution was focused solely on abundance dynamics,  
417 and ignored trait dynamics. Abundance data are the most available, with databases such as Living  
418 Planet Index (LPI) or BioTime (Dornelas et al. 2018) offering an opportunity to analyze abundance  
419 time series data (>22,000) for future forecasts of population declines at a global scale. However,  
420 average time series length in the LPI databases is around 10.3 years and median length of 6 years. It is  
421 thus of foremost importance to understand whether short time series of different resolutions would  
422 affect the predictability of population decline before these statistical tools could be applied widely. Trait  
423 data, such as body size time series are less widely available. Hence, the main motivation of our work is  
424 to develop an understanding of the efficacy of abundance-based EWS in forecasting population decline  
425 when time series lengths are variable and are of varying resolutions.

426 Trait-based simulation of population dynamics could essentially be done using a quantitative genetic  
427 framework (see Baruah et al., 2019a). Infact, a recent simulation study, on comparing the strength of  
428 abundance-based and trait-based EWS, have implied the preferential use of trait-based EWS over  
429 abundance-based EWS. This particular study suggested that under certain ecological circumstances

430 such, as high trait plasticity, and/or high reproductive rate, trait-based EWS outperformed abundance-  
431 based EWS in predicting population declines (Baruah et. al 2019b). Parallel to their simulation study,  
432 we show with experimental data from microcosms, that despite shorter timeseries lengths and/or low  
433 sampling resolutions, body-size based signals outperform abundance-based EWS. Whether a trait, such  
434 as body size, could be included among the suite of EWS will depend not only on the type of the trait  
435 but also on whether external environmental forcing affects the trait. If external environmental forcing  
436 does not affect body size it is expected that body size based EWS will fail in forecasting potential  
437 population declines. We thus expect traits that are correlated to fitness of an organism to be potential  
438 candidates to be included within the suite of trait based EWS.

439 That being said, body-size based signals are clearly potential candidates to be included alongside  
440 generic EWS of population collapse. Recent study on this aspect have highlighted the environmental,  
441 ecological, and evolutionary circumstances under which it is possible for phenotypic traits to shift  
442 before a potential population decline and thus act as a warning signal (Baruah et al. 2019a)). The  
443 strength of shifts in phenotypic trait such as body size, was dependent on how fast the environment  
444 changes, how plastic the trait is to changes in the external environment, and how high genetic variation  
445 was in the trait (Baruah et al. 2019). Infact, strength of trait-based EWS was directly dependent on the  
446 above ecological and evolutionary factors. For instance, it was suggested that, high levels of plasticity  
447 in the trait led to stronger trait-based EWS (Baruah et al. 2019b).

448

449 In our modelling scenarios, we chose a specific set of parameters to evaluate the performance of EWS  
450 in the face of myriad sampling lengths and resolutions. The choice of such a specific set of parameters  
451 that we used in our simulations were motivated through an iterative process that returned time series  
452 spanning a large range of forcing values while maintaining time series lengths. Changes in the  
453 parameter values of strength in forcing levels or growth rate did not significantly alter our simulation

454 results (see appendix S1: Fig. S4-5). In fact, even when forcing levels and growth rate of the population  
455 was altered, we observe similar results: longer time series generally led to stronger forecasts of  
456 population collapse, while low resolution led to poor forecasts of population collapse with EWS.

457

458 Our findings on the effect of sampling length on the forecasting of population collapse by EWS suggest  
459 that the length of sampling required to calculate confident forecasts by abundance-based EWS are very  
460 long and likely impractical from a conservation and monitoring standpoint. On the other hand, trait-  
461 based EWS can give accurate and reliable forecasts with much less sampling data compared to their  
462 abundance-based counterparts.

463

#### 464 **Conclusion**

465 Our results stemming from simulations and a laboratory microcosm study make a case for the use of  
466 trait-based EWS over classical abundance-based signals based on their increased reliability and  
467 strength when faced with varying lengths and resolutions of sampling time series. We attempted here to  
468 evaluate these EWS with data which might more realistically resemble data gathered from field  
469 monitoring programs. However, true field data arising from monitoring programs are likely to be  
470 noisier than the data we have presented and analyzed here. Nonetheless, our results suggest that  
471 abundance-based EWS perform poorly when the length or resolution of abundance time series with  
472 regards to the process rate of the system is decreased. We found that including trait dynamics alongside  
473 abundance-based EWS to generate trait-based EWS leads to more reliable and confident forecasts of  
474 population collapse. We further found in our simulations that a length of ten generations and a  
475 resolution of a half generation are the minimum for deriving confident forecasts with abundance-based  
476 EWS. If trait-based EWS are used, this length and resolution requirement is much more relaxed. With  
477 these results in mind, we recommend considerations be made for the length and resolution of sampling

478 time series required to accurately forecast populations in the design of monitoring programs. Further,  
479 we recommend the additional monitoring of phenotypic traits in populations, which have been shown  
480 to vary with increasing levels of environmental forcing such that trait-based EWS which have more  
481 forecasting power and reliability can be derived.

482 **Acknowledgments:** The authors declare no conflict of interests. AA acknowledges support and  
483 funding from the University of Zurich BUSS program. The research was funded by ERC gran 337785  
484 and Swiss National Science Foundation grant 31003A-182286 to AO and Forschungskredit Nr. FK-18-  
485 082 to GB.

486 **Literature cited**

487 Baruah, G., C. F. Clements, F. Guillaume, and A. Ozgul. 2019a. When Do Shifts in Trait Dynamics  
488 Precede Population Declines? *The American Naturalist* 193:633–644.

489 Baruah, G., C. F. Clements, and A. Ozgul. 2019b. Eco-evolutionary processes underlying early warning  
490 signals of population declines. *Journal of Animal Ecology* 0.

491 Beers, C. D. 1926. The life-cycle in the ciliate *Didinium nasutum* with reference to encystment. *Journal*  
492 *of Morphology* 42:1–21.

493 van Benthem, K. J., H. Froy, T. Coulson, L. L. Getz, M. K. Oli, and A. Ozgul. 2017. Trait-demography  
494 relationships underlying small mammal population fluctuations. *Journal of Animal Ecology* 86:348–  
495 358.

496 Biggs, R., S. R. Carpenter, and W. A. Brock. 2009. Turning back from the brink: Detecting an  
497 impending regime shift in time to avert it. *Proceedings of the National Academy of Sciences* 106:826–  
498 831.

499 Boerlijst, M. C., T. Oudman, and A. M. de Roos. 2013a. Catastrophic Collapse Can Occur without  
500 Early Warning: Examples of Silent Catastrophes in Structured Ecological Models. *PLoS ONE* 8.

- 501 Boerlijst, M. C., T. Oudman, and A. M. de Roos. 2013b. Catastrophic Collapse Can Occur without  
502 Early Warning: Examples of Silent Catastrophes in Structured Ecological Models. *PLOS ONE*  
503 8:e62033.
- 504 Boettiger, C., and A. Hastings. 2013. No early warning signals for stochastic transitions: insights from  
505 large deviation theory. *Proceedings of the Royal Society, Series B* 280:20131372–20131372.
- 506 Boettiger, C., N. Ross, and A. Hastings. 2013. Early warning signals: The charted and uncharted  
507 territories. *Theoretical Ecology* 6:255–264.
- 508 Brown, J. H., J. F. Gillooly, A. P. Allen, V. M. Savage, and G. B. West. 2004. Toward a Metabolic  
509 Theory of Ecology. *Ecology* 85:1771–1789.
- 510 Burthe, S. J., P. A. Henrys, E. B. Mackay, B. M. Spears, R. Campbell, L. Carvalho, B. Dudley, I. D. M.  
511 Gunn, D. G. Johns, S. C. Maberly, L. May, M. A. Newell, S. Wanless, I. J. Winfield, S. J. Thackeray,  
512 and F. Daunt. 2016. Do early warning indicators consistently predict nonlinear change in long-term  
513 ecological data? *Journal of Applied Ecology* 53:666–676.
- 514 Carpenter, S. R., J. J. Cole, M. L. Pace, R. Batt, W. A. Brock, T. Cline, J. Coloso, J. R. Hodgson, J. F.  
515 Kitchell, D. A. Seekell, L. Smith, and B. Weidel. 2011. Early Warnings of Regime Shifts: A Whole-  
516 Ecosystem Experiment. *Science* 332:1079–1082.
- 517 Cheung, W. W. L., J. L. Sarmiento, J. Dunne, T. L. Frölicher, V. W. Y. Lam, M. L. D. Palomares, R.  
518 Watson, and D. Pauly. 2013. Shrinking of fishes exacerbates impacts of global ocean changes on  
519 marine ecosystems. *Nature Climate Change* 3:254–258.
- 520 Clements, C. F., J. L. Blanchard, K. L. Nash, M. A. Hindell, and A. Ozgul. 2017. Body size shifts and  
521 early warning signals precede the historic collapse of whale stocks. *Nature Ecology & Evolution*  
522 1:0188.
- 523 Clements, C. F., J. M. Drake, J. I. Griffiths, and A. Ozgul. 2015. Factors Influencing the Detectability  
524 of Early Warning Signals of Population Collapse. *The American Naturalist* 186:50–58.

- 525 Clements, C. F., and A. Ozgul. 2016a. Including trait-based early warning signals helps predict  
526 population collapse. *Nature Communications* 7:10984.
- 527 Clements, C. F., and A. Ozgul. 2016b. Rate of forcing and the forecastability of critical transitions.  
528 *Ecology and Evolution* 6:7787–7793.
- 529 Clements, C. F., and A. Ozgul. 2018. Indicators of transitions in biological systems. *Ecology Letters*  
530 21:905–919.
- 531 Collette, B. B., K. E. Carpenter, B. A. Polidoro, M. J. Juan-Jordá, A. Boustany, D. J. Die, C. Elfes, W.  
532 Fox, J. Graves, L. R. Harrison, R. McManus, C. V. Minte-Vera, R. Nelson, V. Restrepo, J. Schratwieser,  
533 C.-L. Sun, A. Amorim, M. B. Peres, C. Canales, G. Cardenas, S.-K. Chang, W.-C. Chiang, N. de O.  
534 Leite, H. Harwell, R. Lessa, F. L. Fredou, H. A. Oxenford, R. Serra, K.-T. Shao, R. Sumaila, S.-P.  
535 Wang, R. Watson, and E. Yáñez. 2011. High Value and Long Life—Double Jeopardy for Tunas and  
536 Billfishes. *Science* 333:291–292.
- 537 Costanza, R., R. d’Arge, R. de Groot, S. Farber, M. Grasso, B. Hannon, K. Limburg, S. Naeem, R. V.  
538 O’Neill, J. Paruelo, R. G. Raskin, P. Sutton, and M. van den Belt. 1997. The value of the world’s  
539 ecosystem services and natural capital. *Nature* 387:253–260.
- 540 Dai, L., D. Vorselen, K. S. Korolev, and J. Gore. 2012. Generic Indicators for Loss of Resilience Before  
541 a Tipping Point Leading to Population Collapse. *Science* 336:1175–1177.
- 542 Dakos, V., S. R. Carpenter, W. A. Brock, A. M. Ellison, V. Guttal, A. R. Ives, S. Kéfi, V. Livina, D. A.  
543 Seekell, E. H. van Nes, and M. Scheffer. 2012a. Methods for Detecting Early Warnings of Critical  
544 Transitions in Time Series Illustrated Using Simulated Ecological Data. *PLOS ONE* 7:e41010.
- 545 Dakos, V., E. H. van Nes, P. D’Odorico, and M. Scheffer. 2012b. Robustness of variance and  
546 autocorrelation as indicators of critical slowing down. *Ecology* 93:264–271.

- 547 Dakos, V., M. Scheffer, E. H. van Nes, V. Brovkin, V. Petoukhov, and H. Held. 2008. Slowing down as  
548 an early warning signal for abrupt climate change. *Proceedings of the National Academy of Sciences*  
549 105:14308–14312.
- 550 Dornelas, M., L. H. Antão, F. Moyes, A. E. Bates, A. E. Magurran, D. Adam, A. A. Akhmetzhanova, W.  
551 Appeltans, J. M. Arcos, H. Arnold, N. Ayyappan, G. Badihi, A. H. Baird, M. Barbosa, T. E. Barreto, C.  
552 Bäessler, A. Bellgrove, J. Belmaker, L. Benedetti-Cecchi, B. J. Bett, A. D. Bjorkman, M. Błażewicz, S.  
553 A. Blowes, C. P. Bloch, T. C. Bonebrake, S. Boyd, M. Bradford, A. J. Brooks, J. H. Brown, H.  
554 Bruelheide, P. Budy, F. Carvalho, E. Castañeda-Moya, C. A. Chen, J. F. Chamblee, T. J. Chase, L. S.  
555 Collier, S. K. Collinge, R. Condit, E. J. Cooper, J. H. C. Cornelissen, U. Cotano, S. K. Crow, G.  
556 Damasceno, C. H. Davies, R. A. Davis, F. P. Day, S. Degraer, T. S. Doherty, T. E. Dunn, G. Durigan, J.  
557 E. Duffy, D. Edelist, G. J. Edgar, R. Elahi, S. C. Elmendorf, A. Enemar, S. K. M. Ernest, R. Escribano,  
558 M. Estiarte, B. S. Evans, T.-Y. Fan, F. T. Farah, L. L. Fernandes, F. Z. Farneda, A. Fidelis, R. Fitt, A. M.  
559 Fosaa, G. A. D. C. Franco, G. E. Frank, W. R. Fraser, H. García, R. C. Gatti, O. Givan, E. Gorgone-  
560 Barbosa, W. A. Gould, C. Gries, G. D. Grossman, J. R. Gutierrez, S. Hale, M. E. Harmon, J. Harte, G.  
561 Haskins, D. L. Henshaw, L. Hermanutz, P. Hidalgo, P. Higuchi, A. Hoey, G. V. Hoey, A. Hofgaard, K.  
562 Holeck, R. D. Hollister, R. Holmes, M. Hoogenboom, C. Hsieh, S. P. Hubbell, F. Huettmann, C. L.  
563 Huffard, A. H. Hurlbert, N. M. Ivanauskas, D. Janík, U. Jandt, A. Jazdzewska, T. Johannessen, J.  
564 Johnstone, J. Jones, F. A. M. Jones, J. Kang, T. Kartawijaya, E. C. Keeley, D. A. Kelt, R. Kinnear, K.  
565 Klanderud, H. Knutsen, C. C. Koenig, A. R. Körtz, K. Král, L. A. Kuhnz, C.-Y. Kuo, D. J. Kushner, C.  
566 Laguionie-Marchais, L. T. Lancaster, C. M. Lee, J. S. Lefcheck, E. Lévesque, D. Lightfoot, F. Lloret, J.  
567 D. Lloyd, A. López-Baucells, M. Louzao, J. S. Madin, B. Magnússon, S. Malamud, I. Matthews, K. P.  
568 McFarland, B. McGill, D. McKnight, W. O. McLarney, J. Meador, P. L. Meserve, D. J. Metcalfe, C. F.  
569 J. Meyer, A. Michelsen, N. Milchakova, T. Moens, E. Moland, J. Moore, C. M. Moreira, J. Müller, G.



- 570 Murphy, I. H. Myers-Smith, R. W. Myster, A. Naumov, F. Neat, J. A. Nelson, M. P. Nelson, S. F.  
571 Newton, N. Norden, J. C. Oliver, E. M. Olsen, V. G. Onipchenko, K. Pabis, R. J. Pabst, A. Paquette, S.  
572 Pardede, D. M. Paterson, R. Pélissier, J. Peñuelas, A. Pérez-Matus, O. Pizarro, F. Pomati, E. Post, H. H.  
573 T. Prins, J. C. Priscu, P. Provoost, K. L. Prudic, E. Pulliainen, B. R. Ramesh, O. M. Ramos, A.  
574 Rassweiler, J. E. Rebelo, D. C. Reed, P. B. Reich, S. M. Remillard, A. J. Richardson, J. P. Richardson,  
575 I. van Rijn, R. Rocha, V. H. Rivera-Monroy, C. Rixen, K. P. Robinson, R. R. Rodrigues, D. de C.  
576 Rossa-Feres, L. Rudstam, H. Ruhl, C. S. Ruz, E. M. Sampaio, N. Rybicki, A. Rypel, S. Sal, B. Salgado,  
577 F. A. M. Santos, A. P. Savassi-Coutinho, S. Scanga, J. Schmidt, R. Schooley, F. Setiawan, K.-T. Shao,  
578 G. R. Shaver, S. Sherman, T. W. Sherry, J. Siciński, C. Sievers, A. C. da Silva, F. R. da Silva, F. L.  
579 Silveira, J. Slingsby, T. Smart, S. J. Snell, N. A. Soudzilovskaia, G. B. G. Souza, F. M. Souza, V. C.  
580 Souza, C. D. Stallings, R. Stanforth, E. H. Stanley, J. M. Sterza, M. Stevens, R. Stuart-Smith, Y. R.  
581 Suarez, S. Supp, J. Y. Tamashiro, S. Tarigan, G. P. Thiede, S. Thorn, A. Tolvanen, M. T. Z. Toniato, Ø.  
582 Totland, R. R. Twilley, G. Vaitkus, N. Valdivia, M. I. Vallejo, T. J. Valone, C. V. Colen, J. Vanaverbeke,  
583 F. Venturoli, H. M. Verheye, M. Vianna, R. P. Vieira, T. Vrška, C. Q. Vu, L. V. Vu, R. B. Waide, C.  
584 Waldock, D. Watts, S. Webb, T. Wesolowski, E. P. White, C. E. Widdicombe, D. Wilgers, R. Williams,  
585 S. B. Williams, M. Williamson, M. R. Willig, T. J. Willis, S. Wipf, K. D. Woods, E. J. Woehler, K.  
586 Zawada, and M. L. Zettler. 2018. BioTIME: A database of biodiversity time series for the  
587 Anthropocene. *Global Ecology and Biogeography* 27:760–786.  
588 Drake, J. M., and B. D. Griffen. 2010. Early warning signals of extinction in deteriorating  
589 environments. *Nature* 467:456–459.  
590 Dutta, P. S., Y. Sharma, and K. C. Abbott. 2018. Robustness of early warning signals for catastrophic  
591 and non-catastrophic transitions. *Oikos* 127:1251–1263.

- 592 Folke, C., S. Carpenter, B. Walker, M. Scheffer, T. Elmqvist, L. Gunderson, and C. S. Holling. 2004.  
593 Regime Shifts, Resilience, and Biodiversity in Ecosystem Management. *Annual Review of Ecology,  
594 Evolution, and Systematics* 35:557–581.
- 595 Hastings, A., and D. B. Wysham. 2010. Regime shifts in ecological systems can occur with no warning.  
596 *Ecology Letters* 13:464–472.
- 597 Hilborn, R., T. A. Branch, B. Ernst, A. Magnusson, C. V. Minte-Vera, M. D. Scheuerell, and J. L.  
598 Valero. 2003. State of the World’s Fisheries. *Annual Review of Environment and Resources* 28:359–  
599 399.
- 600 Hughes, T. P., M. L. Barnes, D. R. Bellwood, J. E. Cinner, G. S. Cumming, J. B. C. Jackson, J.  
601 Kleypas, I. A. van de Leemput, J. M. Lough, T. H. Morrison, S. R. Palumbi, E. H. van Nes, and M.  
602 Scheffer. 2017. Coral reefs in the Anthropocene. *Nature* 546:82–90.
- 603 Ozgul, A., S. Tuljapurkar, T. G. Benton, J. M. Pemberton, T. H. Clutton-Brock, and T. Coulson. 2009.  
604 The Dynamics of Phenotypic Change and the Shrinking Sheep of St. Kilda. *Science* 325:464–467.
- 605 Pace, M. L., R. D. Batt, C. D. Buelo, S. R. Carpenter, J. J. Cole, J. T. Kurtzweil, and G. M. Wilkinson.  
606 2017. Reversal of a cyanobacterial bloom in response to early warnings. *Proceedings of the National  
607 Academy of Sciences* 114:352–357.
- 608 Pigeon, G., T. H. G. Ezard, M. Festa-Bianchet, D. W. Coltman, and F. Pelletier. 2017. Fluctuating  
609 effects of genetic and plastic changes in body mass on population dynamics in a large herbivore.  
610 *Ecology* 98:2456–2467.
- 611 R Core Team. 2018. R: A Language and Environment for Statistical Computing. Vienna, Austria.
- 612 Scheffer, M., J. Bascompte, W. A. Brock, V. Brovkin, S. R. Carpenter, V. Dakos, H. Held, E. H. van  
613 Nes, M. Rietkerk, and G. Sugihara. 2009. Early-warning signals for critical transitions. *Nature* 461:53–  
614 59.

- 615 Smith, V. H., and D. W. Schindler. 2009. Eutrophication science: where do we go from here? Trends in  
616 Ecology & Evolution 24:201–207.
- 617 Spanbauer, T. L., C. R. Allen, D. G. Angeler, T. Eason, S. C. Fritz, A. S. Garmestani, K. L. Nash, J. R.  
618 Stone, C. A. Stow, and S. M. Sundstrom. 2016. Body size distributions signal a regime shift in a lake  
619 ecosystem. Proc. R. Soc. B 283:20160249.
- 620 Walle, J. V. de, G. Pigeon, A. Zedrosser, J. E. Swenson, and F. Pelletier. 2018. Hunting regulation  
621 favors slow life histories in a large carnivore. Nature Communications 9:1100.
- 622 Wilkinson, G. M., S. R. Carpenter, J. J. Cole, M. L. Pace, R. D. Batt, C. D. Buelo, and J. T. Kurtzweil.  
623 2017. Early warning signals precede cyanobacterial blooms in multiple whole-lake experiments.  
624 Ecological Monographs 88:188–203.
- 625 Wissel, C. 1984. A Universal Law of the Characteristic Return Time near Thresholds. Oecologia  
626 65:101–107.
- 627
- 628
- 629
- 630
- 631
- 632
- 633
- 634
- 635
- 636
- 637
- 638

639 **Figure legends**

640

641 **Figure 1.** Boxplots of the strength of abundance-based early warning signals of population collapse  
642 across decreasing resolutions of sub-sampling in simulated populations subjected to collapse by  
643 harvesting. The data is split into subplots based on the bifurcation model simulated (fold, transcritical)  
644 and forcing level (slow, medium, fast). Boxplots are further split by metric used (yellow: standard  
645 deviation, red: autocorrelation at-first-lag). Each box represents the median Kendall's tau value (shown  
646 on the y-axis) across replicate time series across three forcing level with lengths ranging from 1,000 to  
647 40 time steps. The x-axis shows the resolution of sampling in numbers of generations such that a value  
648 of 2 indicates that sampling was performed every 2 generations and 0.25 denotes sampling every  
649 quarter generation.

650

651 **Figure 2.** Performance of abundance-based early warning signals of population collapse across  
652 decreasing sampling time-series lengths in simulated populations subjected to collapse by harvesting.  
653 The data is split into subplots based on forcing intensity (slow, moderate, fast) and further split by  
654 metric used (yellow: standard deviation, red: autocorrelation at-lag-1) and bifurcation model simulated  
655 (solid: fold model, dashed: transcritical model). Each point represents (A) the mean Kendall's tau  
656 correlation coefficient or (B) rate of false negatives on the y-axis of 100 replicate simulations of  
657 population collapse. X-axis represents length of time series analyzed.

658

659 **Figure 3.** Performance of abundance-based (lighter colors) and trait-based EWS (darker colors) of  
660 population collapse across decreasing sampling time-series resolutions for the experimental data of  
661 Clements & Ozgul 2016. Plots are organized into subplots based on the forcing intensity (slow,  
662 medium, fast) and further split by metric used (blue: standard deviation, purple: autocorrelation at-first-

663 lag). Each box represents the Kendall's tau value (on the y axis) for each resolution studied (on the x  
664 axis). Lighter colors represent classical abundance-based EWS while the darker colours represent trait-  
665 based EWS.

666

667 **Figure 4.** Performance of abundance-based and trait-based EWS of population collapse across  
668 decreasing sampling time-series lengths for the experimental data of Clements & Ozgul 2016. Plots are  
669 organized into subplots based on the forcing intensity (slow, medium, fast). X-axis is the length of  
670 time-series data analyzed and Y-axis denotes in (A) mean Kendall's Tau value and in (B) rate of false  
671 negatives. Solid lines indicate EWS with body size information added (trait-based EWS) while dotted  
672 lines indicate classical abundance-based EWS. Colours indicate metric used (blue: standard deviation,  
673 purple: autocorrelation at-first-lag). False negative plots were produced using loess smoothing.

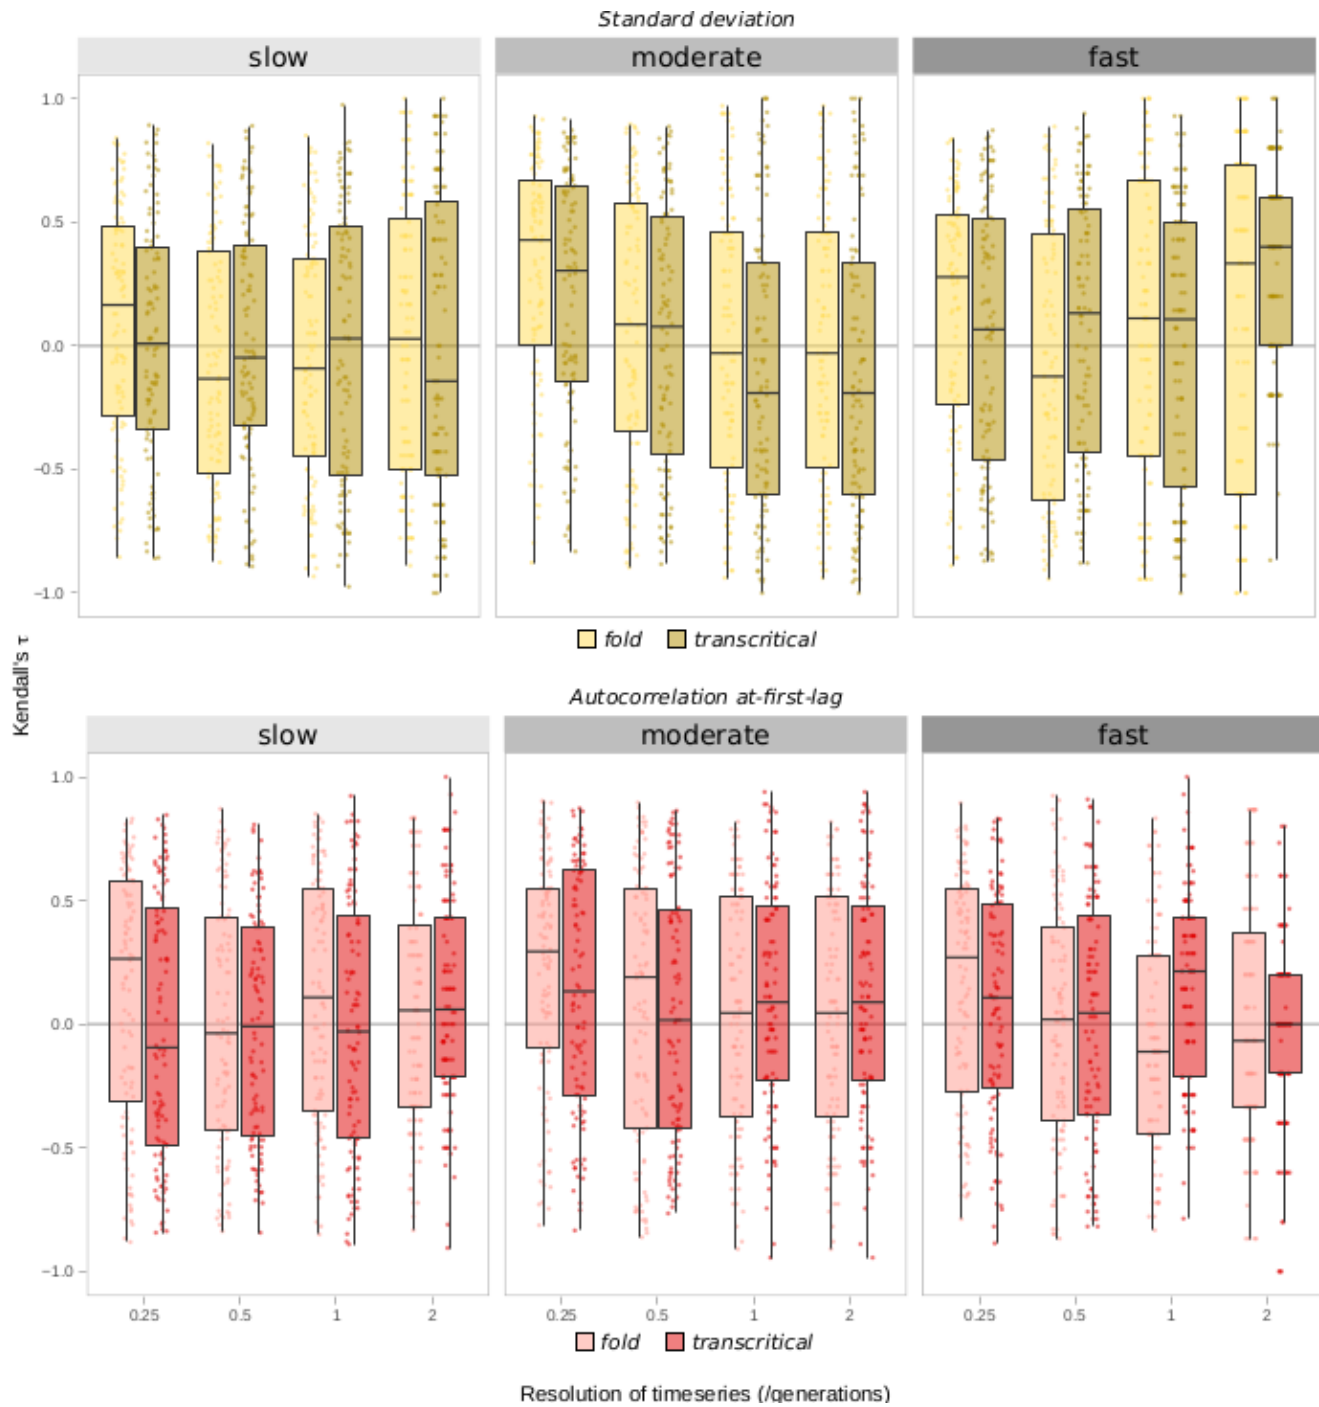

674

675

676

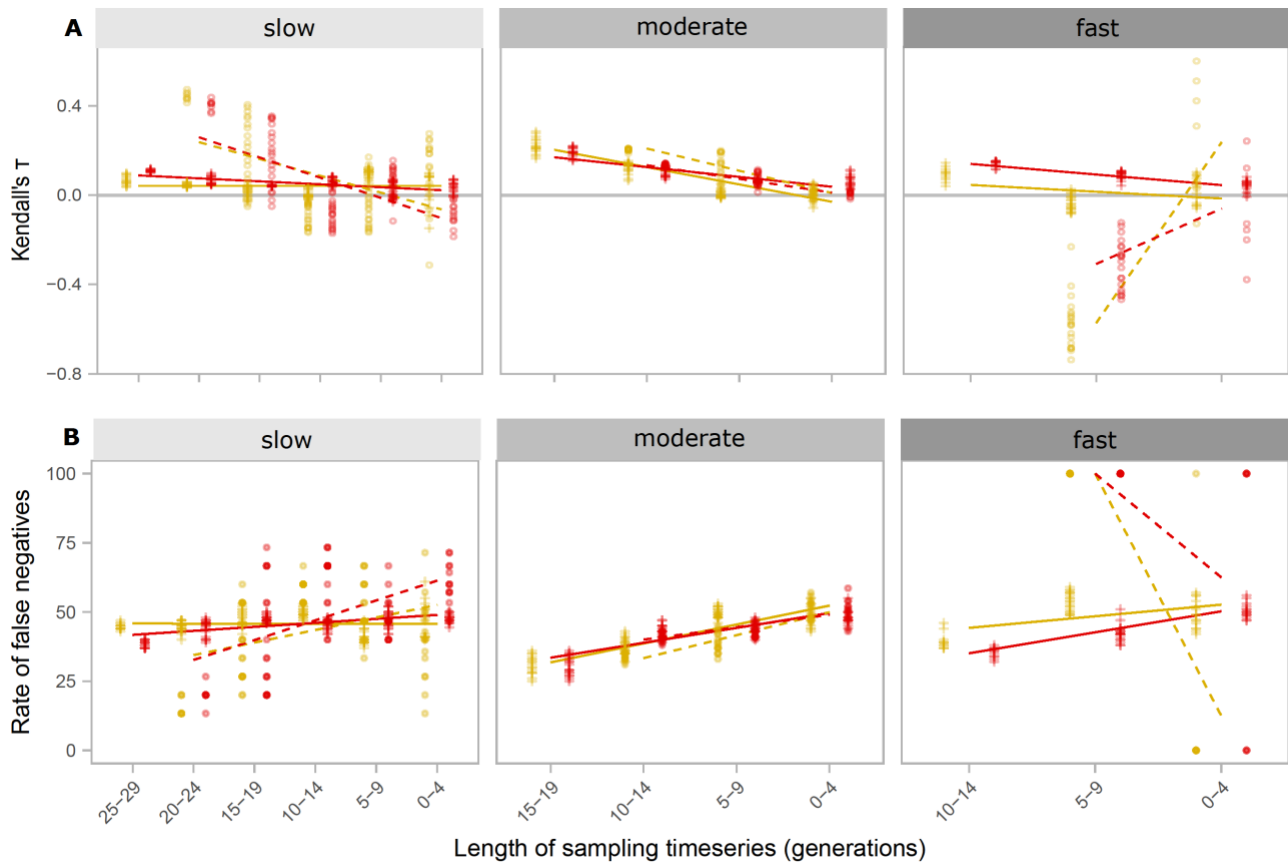

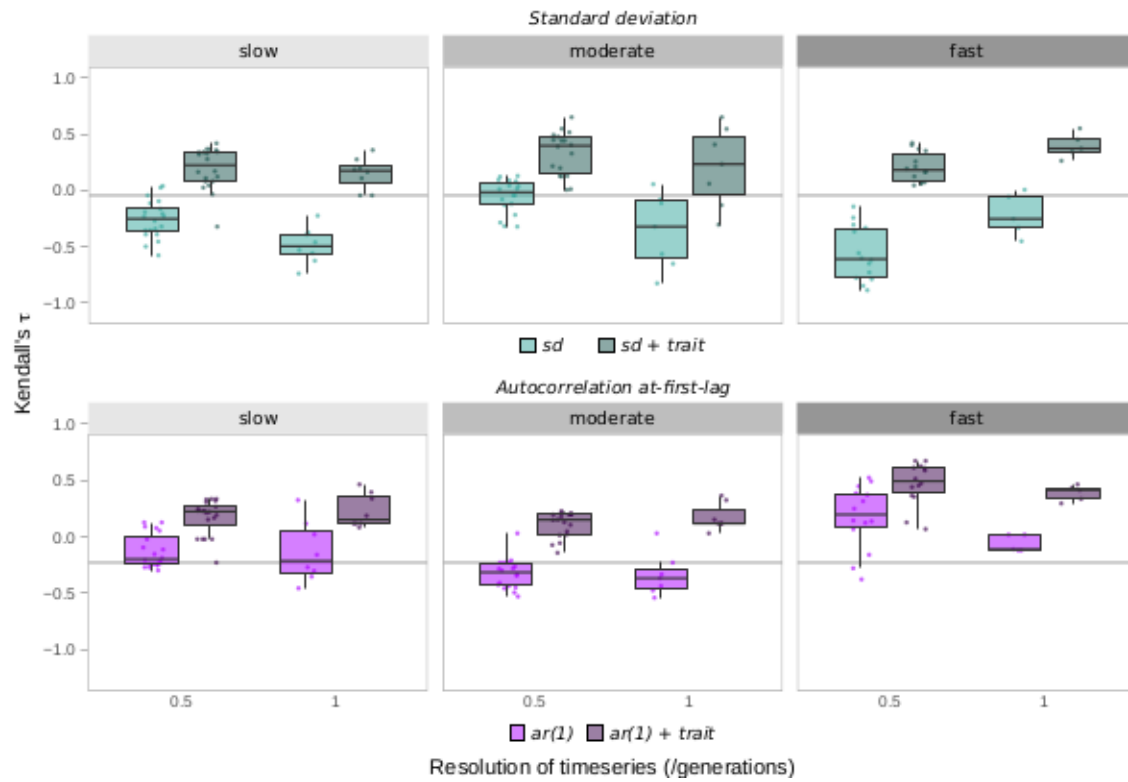



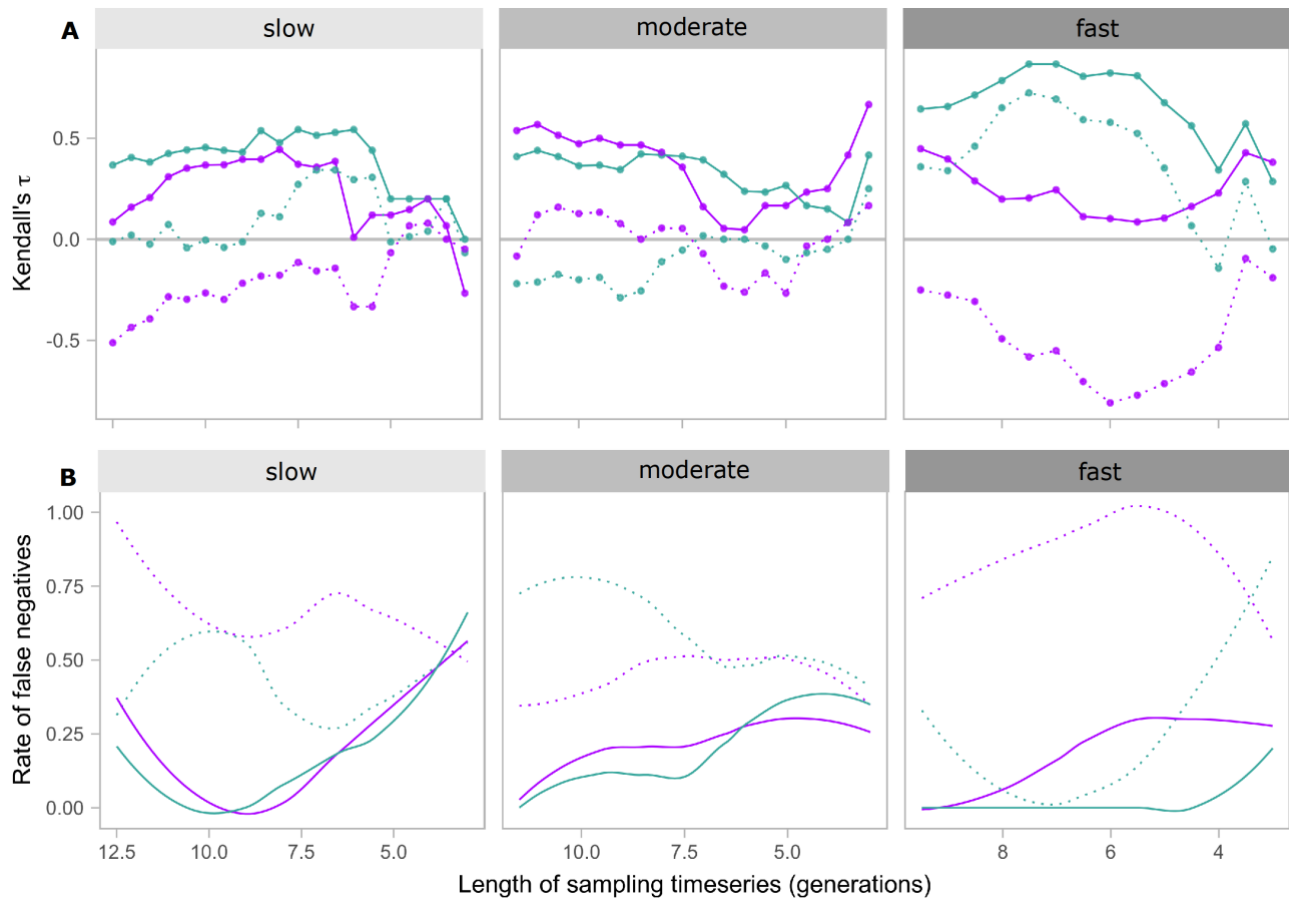

679

680

681

682

683

684

685

686

687

688

689

690
